# Supplementary material for: DCRM Multispecialty Practice Recommendations for the management of diabetes, cardiorenal, and metabolic diseases
Source: PubMed Central journal article supplement (PMC9803322; doi:10.1016/j.jdiacomp.2021.108101), 2021-12-07
Supplement: NIHMS1853694-supplement-Supplementary_Tables_1_and_2.pdf [file NIHMS1853694-supplement-Supplementary_Tables_1_and_2.pdf]

## **Tables S1 and S2**

### **DCRM Multispecialty Practice Recommendations for the Management of Diabetes, Cardiorenal, and Metabolic Diseases**

Yehuda Handelsman (Chair), John E. Anderson, George L. Bakris, Christie M. Ballantyne, Joshua A. Beckman, Deepak L. Bhatt, Zachary T. Bloomgarden, Biykem Bozkurt, Matthew J. Budoff, Javed Butler, Samuel Dagogo-Jack, Ian H. de Boer, Ralph A. DeFronzo, Robert H. Eckel, Daniel Einhorn, Vivian A. Fonseca, Jennifer B. Green, George Grunberger, Chris Guerin, Silvio E. Inzucchi, Paul S. Jellinger, Mikhail N. Kosiborod, Pamela Kushner, Norman Lepor, Christian W. Mende, Erin D. Michos, Jorge Plutzky, Pam R. Taub, Guillermo E. Umpierrez, Muthiah Vaduganathan, Matthew R. Weir

Table S1. Risk-based LDL-C goals from the ACC/AHA, AACE, and ESC/EAS

| <b>LDL-C target</b>              | <b>Society</b>       | <b>Society risk category</b> |
|----------------------------------|----------------------|------------------------------|
| Consider <40 mg/dL (<1.0 mmol/L) | ESC/EAS <sup>1</sup> | Very high risk-plus          |
| <55 mg/dL (<1.4 mmol/L)          | AACE <sup>2</sup>    | Extreme risk                 |
|                                  | ESC/EAS <sup>1</sup> | Very high risk               |
| <70 mg/dL (<1.8 mmol/L)          | AACE <sup>2</sup>    | Very high risk               |
|                                  | ESC/EAS <sup>1</sup> | High risk                    |
|                                  | ACC/AHA <sup>3</sup> | Very high risk               |

AACE, American Association of Clinical Endocrinologists; ACC, American College of Cardiology; AHA, American Heart Association; EAS, European Atherosclerotic Society; ESC, European Society of Cardiology; LDL-C, low-density lipoprotein cholesterol.

Table S2. ASCVD risk calculators

| <b>Name</b>                                                                                             | <b>Web address</b>                                                                                                                                                                                  |
|---------------------------------------------------------------------------------------------------------|-----------------------------------------------------------------------------------------------------------------------------------------------------------------------------------------------------|
| Multiethnic Study of Atherosclerosis (MESA) CHD risk estimator <sup>4</sup>                             | <a href="https://www.mesa-nhlbi.org/CAC-Tools.aspx">https://www.mesa-nhlbi.org/CAC-Tools.aspx</a>                                                                                                   |
| Framingham Risk Equation <sup>5</sup>                                                                   | <a href="https://framinghamheartstudy.org/fhs-risk-functions/cardiovascular-disease-10-year-risk/">https://framinghamheartstudy.org/fhs-risk-functions/cardiovascular-disease-10-year-risk/</a>     |
| Reynold's Risk Score <sup>6</sup>                                                                       | <a href="http://www.reynoldsriskscore.org">http://www.reynoldsriskscore.org</a>                                                                                                                     |
| United Kingdom Prospective Diabetes Study (UKPDS) Risk Engine (for patients with diabetes) <sup>7</sup> | <a href="https://www.dtu.ox.ac.uk/riskengine/">https://www.dtu.ox.ac.uk/riskengine/</a>                                                                                                             |
| ACC/AHA pooled-cohort ASCVD Risk Estimator <sup>8</sup>                                                 | <a href="http://www.cvriskcalculator.com">www.cvriskcalculator.com</a>                                                                                                                              |
| Building, Relating, Assessing, and Validating Outcomes (BRAVO) risk engine <sup>9</sup>                 | <a href="http://www.bravo4health.com">http://www.bravo4health.com</a>                                                                                                                               |
| Systematic Coronary Risk Evaluation 2 (SCORE2) <sup>10</sup>                                            | <a href="https://www.escardio.org/Education/Practice-Tools/CVD-prevention-toolbox/SCORE-Risk-Charts">https://www.escardio.org/Education/Practice-Tools/CVD-prevention-toolbox/SCORE-Risk-Charts</a> |
